# Supplementary material for: Systematic review and meta-analysis of gemcitabine-based chemotherapy after FOLFIRINOX in advanced pancreatic cancer
Source: PubMed Central journal article supplement — Ther Adv Med Oncol. 2020 Feb 28;12:1758835920905408. doi: 10.1177/1758835920905408 (PMC7052451; doi:10.1177/1758835920905408), 2020-02-28

## Supplementary Material

### Summary

|                                                                                                            |    |
|------------------------------------------------------------------------------------------------------------|----|
| <i>Supplementary tables</i> .....                                                                          | 2  |
| Supplementary table 1. PICO framework of the systematic review.....                                        | 3  |
| Supplementary table 2. Search strategy.....                                                                | 4  |
| Supplementary table 3. Collected variables among the selected studies.....                                 | 6  |
| Supplementary table 4. Reasons for study exclusion in the second screening round .....                     | 10 |
| Supplementary table 5. Bibliographic characteristics of the selected studies .....                         | 15 |
| Supplementary table 6. Characteristics of the populations from the selected studies .....                  | 16 |
| Supplementary table 7. Treatment characteristics .....                                                     | 19 |
| Supplementary table 8. Risk of bias assessment .....                                                       | 20 |
| Supplementary table 9. Evaluation of response to treatment.....                                            | 23 |
| Supplementary table 10. Toxicity data (part 1) .....                                                       | 24 |
| Supplementary table 11. Progression-free survival after start of Gemcitabine-based chemotherapy (PFS)..... | 27 |
| Supplementary table 12. Overall Survival after start of Gemcitabine-based chemotherapy (OS-GEM) .....      | 28 |
| Supplementary table 13. Overall Survival after start of FOLFIRINOX (OS-FFX) .....                          | 29 |
| Supplementary table 14. Biochemical response rate (BRR) to Gemcitabine-based chemotherapy.....             | 30 |
| Supplementary table 15. Toxicity data (part 2) .....                                                       | 31 |
| <i>Supplementary figures</i> .....                                                                         | 34 |
| Supplementary figure 1 .....                                                                               | 35 |
| Supplementary figure 2 .....                                                                               | 36 |
| Supplementary figure 3 .....                                                                               | 37 |

## Supplementary tables

Supplementary Table S1. PICO framework of the systematic review.

| PICO | Domain       | Definition                                                                                                                      |
|------|--------------|---------------------------------------------------------------------------------------------------------------------------------|
| P    | Participants | Patients with advanced pancreatic adenocarcinoma treated with FOLFIRINOX in the first-line setting <sup>§</sup>                 |
| I    | Intervention | Gemcitabine-based chemotherapy as second-line or further line of treatment                                                      |
| C    | Comparison   | -                                                                                                                               |
| O    | Outcomes     | Objective response rate, Disease control rate, Biochemical response rate, Progression-free survival, Overall survival, Toxicity |

<sup>§</sup> Advanced pancreatic adenocarcinoma defined as locally advanced/unresectable or metastatic pancreatic adenocarcinoma.

Supplementary Table S2. Search strategy.

| Database       | Date of search | Date limits                      | Query                         | Search strategy                                                                                                                                                                                                                                                                                                                                                                                                                                                                                                                                                                                                                                                | Number or items |
|----------------|----------------|----------------------------------|-------------------------------|----------------------------------------------------------------------------------------------------------------------------------------------------------------------------------------------------------------------------------------------------------------------------------------------------------------------------------------------------------------------------------------------------------------------------------------------------------------------------------------------------------------------------------------------------------------------------------------------------------------------------------------------------------------|-----------------|
| PubMed         | 11 JUN 2018    | 01 JAN 2011<br>to<br>11 JUN 2018 | # 1<br><br>#2<br><br>#3<br>#4 | (("fluorouracil"[MeSH Terms] OR "fluorouracil"[All Fields]) AND ("irinotecan"[Supplementary Concept] OR "irinotecan"[All Fields]) AND ("oxaliplatin"[Supplementary Concept] OR "oxaliplatin"[All Fields])) OR " FOLFIRINOX" [All Fields]<br><br>(((("pancreatic neoplasm"[MeSH Terms] OR "pancreatic neoplasms"[MeSH Terms]) OR "pancreatic cancer"[MeSH Terms]) OR "pancreatic cancers"[MeSH Terms]) OR ("pancreatic" [All Fields] OR "pancreas" [All Fields]) AND (" cancer" [All Fields] OR " carcinoma" [All Fields]) OR " adenocarcinoma" [All Fields]))<br><br>("gemcitabine"[Supplementary Concept] OR " gemcitabine" [All Fields])<br>#1 AND #2 AND #3 | 291             |
| Embase         | 11 JUN 2018    | 2011<br>to<br>2018               | #1<br>#2<br>#3<br>#4          | (' folfirinox' /exp OR ' folfirinox' )<br><br>( ' pancreas tumor' /exp OR ' pancreas tumor' )<br><br>( ' gemcitabine' /exp OR ' gemcitabine' )<br>#1 AND #2 AND #3                                                                                                                                                                                                                                                                                                                                                                                                                                                                                             | 825             |
| Scopus         | 11 JUN 2018    | 2011<br>to<br>2018               | #1<br>#2<br>#3<br>#4<br>#5    | (folfirinox OR (fluorouracil AND irinotecan AND oxaliplatin))<br><br>(pancreatic OR pancreas)<br><br>(cancer OR carcinoma OR adenocarcinoma)<br><br>(gemcitabine)<br>#1 AND #2 AND #3 AND #4                                                                                                                                                                                                                                                                                                                                                                                                                                                                   | 340             |
| Web of Science | 12 JUN 2018    | 2011<br>to<br>2018               | #1<br>#2<br>#3<br>#4<br>#5    | (folfirinox OR (fluorouracil AND irinotecan AND oxaliplatin))<br><br>(pancreatic OR pancreas)<br><br>(cancer OR carcinoma OR adenocarcinoma)<br><br>(gemcitabine)<br>#1 AND #2 AND #3 AND #4                                                                                                                                                                                                                                                                                                                                                                                                                                                                   | 473             |

Supplementary Table S3. Collected variables among the selected studies.

| Domain                     | Data                                                                                                                                                                                                                                                                                                                                                                                                                                                                                                                                                                    |
|----------------------------|-------------------------------------------------------------------------------------------------------------------------------------------------------------------------------------------------------------------------------------------------------------------------------------------------------------------------------------------------------------------------------------------------------------------------------------------------------------------------------------------------------------------------------------------------------------------------|
| Bibliography               | <ul style="list-style-type: none"> <li>- Study name</li> <li>- Journal name</li> <li>- First author's name</li> <li>- Authors' affiliation</li> <li>- Corresponding address</li> <li>- Study DOI</li> <li>- Year of publication</li> <li>- Type of publication (full-text vs. meeting abstract)</li> </ul>                                                                                                                                                                                                                                                              |
| Substantive / Risk of bias | <ul style="list-style-type: none"> <li>- Country of study</li> <li>- Type of study (prospective vs. retrospective)</li> <li>- Uni-institutional or multi-institutional study</li> <li>- Funding source</li> <li>- Risk of bias evaluation</li> </ul>                                                                                                                                                                                                                                                                                                                    |
| Population details         | <ul style="list-style-type: none"> <li>- Sample size</li> <li>- Diagnostic criteria (biopsy)</li> <li>- Number of male patients</li> <li>- Age (median and range)</li> <li>- ECOG performance status (0 vs. 1 vs. 2 vs. 3)</li> <li>- ECOG performance status (0-1 vs. ≥2)</li> <li>- Number of head/neck tumors</li> <li>- Primary tumor surgery (Yes vs. No)</li> <li>- Adjuvant chemotherapy (Yes vs. No)</li> <li>- Clinical stage at start of FOLFIRINOX (III vs. IV)</li> <li>- Clinical stage at start of Gemcitabine-based chemotherapy (III vs. IV)</li> </ul> |

|               |                                                                                                                                                                                                                                                                                                                                                                                                                                                                                                                                                                        |
|---------------|------------------------------------------------------------------------------------------------------------------------------------------------------------------------------------------------------------------------------------------------------------------------------------------------------------------------------------------------------------------------------------------------------------------------------------------------------------------------------------------------------------------------------------------------------------------------|
|               | <ul style="list-style-type: none"> <li>- Number of metastatic sites at start of Gemcitabine-based chemotherapy (median and range; 0 vs. 1 vs. 2 vs. 3 or more)</li> <li>- CA 19-9 at start of Gemcitabine-based chemotherapy (median and range)</li> <li>- Median (and 95%CI) progression-free survival with FOLFIRINOX (in months)</li> <li>- Number of cycles of FOLFIRINOX (median and range)</li> <li>- Reason for discontinuation of FOLFIRINOX (Progression vs. Toxicity vs. Other reasons)</li> <li>- Number of patients with response to FOLFIRINOX</li> </ul> |
| Intervention  | <ul style="list-style-type: none"> <li>- Type of Gemcitabine-based chemotherapy</li> <li>- Dosing of Gemcitabine-based chemotherapy</li> <li>- Number of cycles of Gemcitabine-based chemotherapy (median and range)</li> </ul>                                                                                                                                                                                                                                                                                                                                        |
| Miscellaneous | <ul style="list-style-type: none"> <li>- Factors associated with overall survival (prognosis)</li> <li>- Factors associated with progression-free survival (prognosis)</li> </ul>                                                                                                                                                                                                                                                                                                                                                                                      |
| Outcomes      | <ul style="list-style-type: none"> <li>- Method used for response evaluation (RECIST vs. non-RECIST)</li> <li>- Independent imaging review (Yes vs. No)</li> <li>- Imaging interval (in weeks)</li> <li>- Biochemical response - CA 19-9 (Yes vs. No)</li> <li>- Definition of biochemical response - CA 19-9</li> </ul>                                                                                                                                                                                                                                               |

|  |                                                                                                                                                                                                                                                                                                                                                                                                                                                                                                                                                                                                                                                                                                                                                                                                                                                                                                                                                                                                                                                                                                                                                                                                                                           |
|--|-------------------------------------------------------------------------------------------------------------------------------------------------------------------------------------------------------------------------------------------------------------------------------------------------------------------------------------------------------------------------------------------------------------------------------------------------------------------------------------------------------------------------------------------------------------------------------------------------------------------------------------------------------------------------------------------------------------------------------------------------------------------------------------------------------------------------------------------------------------------------------------------------------------------------------------------------------------------------------------------------------------------------------------------------------------------------------------------------------------------------------------------------------------------------------------------------------------------------------------------|
|  | <ul style="list-style-type: none"> <li>- Objective response with Gemcitabine-based chemotherapy</li> <li>- Disease control with Gemcitabine-based chemotherapy</li> <li>- Number of patients at risk (Yes vs. No)</li> <li>- Definition of progression-free survival</li> <li>- Number of progression-free survival events</li> <li>- Median progression-free survival – PFS (in months)</li> <li>- Confidence interval of PFS (95%)</li> <li>- Progression-free survival rate at 3 months (in %)</li> <li>- Progression-free survival rate at 6 months (in %)</li> <li>- Number of overall survival events</li> <li>- Median overall survival from start of Gemcitabine-based chemotherapy – OS-GEM (in months)</li> <li>- Confidence interval of OS (95%)</li> <li>- Overall survival rate at 6 months (in %)</li> <li>- Overall survival rate at 12 months (in %)</li> <li>- Median overall survival from start of FOLFIRINOX – OS-FFX (in months)</li> <li>- Confidence interval of OS – FFX (95%)</li> <li>- Overall survival rate at 12 months from start of FFX (in %)</li> <li>- Overall survival rate at 18 months from start of FOLFIRINOX (in %)</li> <li>- Method used to gauge toxicity (e.g.: CTC AE 3.0 or 4.0)</li> </ul> |
|--|-------------------------------------------------------------------------------------------------------------------------------------------------------------------------------------------------------------------------------------------------------------------------------------------------------------------------------------------------------------------------------------------------------------------------------------------------------------------------------------------------------------------------------------------------------------------------------------------------------------------------------------------------------------------------------------------------------------------------------------------------------------------------------------------------------------------------------------------------------------------------------------------------------------------------------------------------------------------------------------------------------------------------------------------------------------------------------------------------------------------------------------------------------------------------------------------------------------------------------------------|



|  |                                                                                                                                                                                                                                                                                                                                                                                                                                                                                                                                                |
|--|------------------------------------------------------------------------------------------------------------------------------------------------------------------------------------------------------------------------------------------------------------------------------------------------------------------------------------------------------------------------------------------------------------------------------------------------------------------------------------------------------------------------------------------------|
|  | <ul style="list-style-type: none"><li>- Rate G3/4 toxicity – overall (in %)</li><li>- Rate G3/4 nausea (in %)</li><li>- Rate G3/4 vomiting (in %)</li><li>- Rate G3/4 diarrhea (in %)</li><li>- Rate G3/4 mucositis (in %)</li><li>- Rate G3/4 peripheral neuropathy (in %)</li><li>- Rate G3/4 fatigue (in %)</li><li>- Rate G3/4 anemia (in %)</li><li>- Rate G3/4 neutropenia (in %)</li><li>- Rate G3/4 febrile neutropenia (in %)</li><li>- Rate G3/4 thrombocytopenia (in %)</li><li>- Rate of treatment-related deaths (in %)</li></ul> |
|--|------------------------------------------------------------------------------------------------------------------------------------------------------------------------------------------------------------------------------------------------------------------------------------------------------------------------------------------------------------------------------------------------------------------------------------------------------------------------------------------------------------------------------------------------|

Supplementary Table S4. Reasons for study exclusion in the second screening round.

| Study                                                                                                                                                                                                             | Reference                                                                                                                      | Category                                                      | Observation                                                                                                                                                                                                 |
|-------------------------------------------------------------------------------------------------------------------------------------------------------------------------------------------------------------------|--------------------------------------------------------------------------------------------------------------------------------|---------------------------------------------------------------|-------------------------------------------------------------------------------------------------------------------------------------------------------------------------------------------------------------|
| Excellent overall survival with FOLFIRINOX followed by Gemcitabine/nab-Paclitaxel or vice versa in metastatic pancreatic cancer-a single center experience                                                        | Andalibi H, Vormittag L, Winkler T, Kafka A, Weiser-Jasch O, Schima,W et al. Memo 2016;9(1):S31(abstr P39).                    | Inability to access full poster.                              | We tried to get in touch with one of the authors (UMV) through e-mail on July 15 <sup>th</sup> 2018 with no success.                                                                                        |
| Cost-effectiveness of FOLFIRINOX for first-line treatment of metastatic pancreatic cancer                                                                                                                         | Attard CL, Brown S, Alloul K, Moore MJ. J Clin Oncol 2012;30(4):(suppl; abstr 199).                                            | No adequate separate data on second-line treatment.           | There was no specific data regarding either efficacy or toxicity of second-line (gemcitabine-based) chemotherapy.                                                                                           |
| Cost-effectiveness of folfirinox for first-line treatment of metastatic pancreatic cancer                                                                                                                         | Attard CL, Brown S, Alloul K, Moore MJ. Current Oncol 2014;21(1):e41-51.                                                       | No adequate separate data on second-line treatment.           | There was no specific data regarding either efficacy or toxicity of second-line (Gemcitabine-based) chemotherapy.                                                                                           |
| The impact of second-line chemotherapy on advanced pancreatic cancer: A retrospective study in Reggio Emilia Clinical Cancer Centre                                                                               | Baldi L, Panebianco M, Rossi PG, Mancuso P, Cassetti T, Sassatelli R, Pinto C. J Clin Oncol 2017;35(15):(suppl;abstr: e15732). | No adequate separate data on first- or second-line treatment. | Patients were treated with multiple regimens in first-line and in second-line. So separate data for patients treated with first-line FOLFIRINOX and second-line Gemcitabine-based chemotherapy are lacking. |
| Comparative effectiveness and resource utilization of nab-paclitaxel plus gemcitabine vs FOLFIRINOX or gemcitabine for the first-line treatment of metastatic pancreatic adenocarcinoma in a US community setting | Braiteh F, Patel MB, Parisi M, Ni QH, Park S, Faria C. Cancer Manag Res 2017;9:141-148.                                        | No adequate separate data on second-line treatment.           | There was no description of the outcomes of patients treated in first-line with FOLFIRINOX that subsequently underwent Gemcitabine-based chemotherapy.                                                      |
| Real-world analysis of treatment patterns examining nab-Paclitaxel plus Gemcitabine (nab-P plus G) versus FOLFIRINOX (FFX) in first-line (10 treatment (tx) of metastatic pancreatic                              | Braiteh F, Patel MB, Parisi M, Ni QH, Park S, Faria C. J Clin Oncol 2016;34(15):(suppl;abstr e18130).                          | No adequate separate data on second-line treatment.           | There was no description of the outcomes of patients treated in first-line with FOLFIRINOX that subsequently underwent Gemcitabine-based chemotherapy.                                                      |

|                                                                                                                                                              |                                                                                                                                          |                                                               |                                                                                                                                                                                                                                                                                                                                                                                 |
|--------------------------------------------------------------------------------------------------------------------------------------------------------------|------------------------------------------------------------------------------------------------------------------------------------------|---------------------------------------------------------------|---------------------------------------------------------------------------------------------------------------------------------------------------------------------------------------------------------------------------------------------------------------------------------------------------------------------------------------------------------------------------------|
| adenocarcinoma (MPAC) in a US community oncology setting.                                                                                                    |                                                                                                                                          |                                                               |                                                                                                                                                                                                                                                                                                                                                                                 |
| Second-line therapy for advanced pancreatic cancer: Evaluation of prognostic factors and review of current literature                                        | Caparello C, Vivaldi C, Fornaro L, Musettini G, Pasquini G, Catanese S, et al.<br>Future Oncol<br>2016;12(7):901-908.                    | No adequate separate data on second-line treatment.           | Patients were treated with a multitude of regimens in the second-line setting. There was no specific description of the outcomes of patients treated with Gemcitabine-based chemotherapy after FOLFIRINOX.                                                                                                                                                                      |
| Impact of Nab-Paclitaxel-based Second-line Chemotherapy in Metastatic Pancreatic Cancer                                                                      | Dadi N, Stanley M, Shahda S, O'Neil BH, Sehdev A.<br>AntiCancer Res<br>2017;37(10):5533-39.                                              | No adequate separate data on first- or second-line treatment. | Not all patients treated in the Nab-Paclitaxel group in the second-line received FOLFIRINOX in the first-line. Also, not all patients in the Nab-Paclitaxel group received Gemcitabine (some received Nab-Paclitaxel alone). So, there was no separate data on patients treated with FOLFIRINOX in the first-line setting and subsequently with Gemcitabine-based chemotherapy. |
| Growth modulation index (GMI) to assess salvage chemotherapy benefit after FOLFIRINOX progression in metastatic pancreatic adenocarcinoma                    | Ducoulombier A, Quintin J, Desjardin M, Hautefeuille V, Desauw C, Parzy A, et al.<br>Eur J Cancer<br>2015;51(suppl 3):S430 (abstr 2294). | No adequate separate data on second-line treatment.           | Not all patients were treated with Gemcitabine-based chemotherapy in the second-line setting. Moreover, the outcomes for different gemcitabine-based regimens are not declared.                                                                                                                                                                                                 |
| Optimal therapeutic sequences in the treatment of metastatic pancreatic cancer-a retrospective analysis from two Canadian and French tertiary cancer centres | Gilbert M, Rho YS, Kavan T, Chanez B, Mamo A, Barrera I, et al.<br>Eur J Cancer<br>2015;51(suppl 3):S455(abstr 2359).                    | Repeated study.                                               | Full-text article already selected .                                                                                                                                                                                                                                                                                                                                            |
| Role of second-line gemcitabine after FOLFIRINOX failure in advanced pancreatic                                                                              | Lino ADR, Martins Jr RM, Abrahao CM, Moreira RB, De Sousa TTS, Gomes JR, et al.                                                          | Repeated study.                                               | Full-text article already selected .                                                                                                                                                                                                                                                                                                                                            |

|                                                                                                                                                         |                                                                                                                                 |                                                     |                                                                                                                                                                                                                                                            |
|---------------------------------------------------------------------------------------------------------------------------------------------------------|---------------------------------------------------------------------------------------------------------------------------------|-----------------------------------------------------|------------------------------------------------------------------------------------------------------------------------------------------------------------------------------------------------------------------------------------------------------------|
| adenocarcinoma: A retrospective analysis                                                                                                                | J Clin Oncol 2015;33(3):(suppl; abstr 473).                                                                                     |                                                     |                                                                                                                                                                                                                                                            |
| The nab-paclitaxel/gemcitabine regimen for patients with refractory advanced pancreatic adenocarcinoma                                                  | Palacio S, Hosein PJ, Reis I, Akunyili II, Ernani V, Pollack T, et al. Gastrointest Oncol 2018;9(1):135-9.                      | No adequate separate data on first-line treatment.  | There were no specific outcomes for patients treated with first-line FOLFIRINOX. The most common first-line regimens were either Gemcitabine plus Cisplatin or Gemcitabine.                                                                                |
| Second-line treatment in patients with FOLFIRINOX-refractory pancreatic adenocarcinoma (PDAC): Doublets or single-agent chemotherapy?                   | Pellei C, Lanese A, Bittoni A, Andrikou K, Santoni M, Conti A, et al. J Clin Oncol 2014;32(15):(suppl;abstr e15186)             | No adequate separate data on second-line treatment. | There were no specific data on the outcomes of Gemcitabine-based chemotherapy (main analysis is about doublet vs single-agent).                                                                                                                            |
| Nab paclitaxel plus gemcitabine for metastatic pancreatic adenocarcinoma after failure of folfirinox: Results of an AGEO multicenter prospective cohort | Portal A, Pernot S, Arbaud C, Tougeron D, Thiro-Bidault A, De La Fouchardiere C, et al. J Clin 2015;33(15):(suppl; abstr 4123). | Repeated study.                                     | Full-text article already selected.                                                                                                                                                                                                                        |
| Can the sequence of chemotherapy regimens influence outcome in patients with metastatic pancreatic adenocarcinoma (MPAC)?                               | Schmidt SL, Durkal V, Jayavalsan SP, Ritch PS, Thomas JP, Erickson B, et al. J Clin Oncol 2016;34(4):(suppl; abstr 428).        | No adequate separate data on second-line treatment. | No adequate data regarding response rate, disease control rate, progression-free survival or toxicity. Overall survival data for the sequence FOLFIRINOX -> Gemcitabine plus Nab-Paclitaxel only from the beginning of first-line treatment.               |
| Outcomes in metastatic pancreatic adenocarcinoma (MPAC) patients treated with FOLFIRINOX (FFX)/FOLFOX(FX) and gemcitabine + nab-paclitaxel (NabG)       | Schmidt SL, Durkal V, Jayavalsan SP, Ritch PS, Thomas JP, Erickson B, et al. J Clin Oncol 2016;34(4):(suppl; abstr 397).        | No adequate separate data on second-line treatment. | Patients treated with second-line Gemcitabine plus Nab-Paclitaxel were treated with FOLFOX or FOLFIRINOX in the first-line setting; there are no separate data for the second-line treatment according to the first-line treatment (FOLFOX vs FOLFIRINOX). |
| The retrospective analysis of gemcitabine + nab-paclitaxel for the                                                                                      | Ueno M, Kobayashi S, Ohkawa S, Tezuka S, Moriya S, Morimoto M. Pancreatology                                                    | Inability to access full poster.                    | We tried to get in touch with one of the authors (MU) through                                                                                                                                                                                              |

|                                                                                                                                                                                                           |                                                                                                                                         |                                                     |                                                                                                                                                                                                            |
|-----------------------------------------------------------------------------------------------------------------------------------------------------------------------------------------------------------|-----------------------------------------------------------------------------------------------------------------------------------------|-----------------------------------------------------|------------------------------------------------------------------------------------------------------------------------------------------------------------------------------------------------------------|
| treatment of advanced pancreatic cancer                                                                                                                                                                   | 2016;16(4):S31(abstr S8-5).                                                                                                             |                                                     | e-mail on July 15 <sup>th</sup> 2018 with no success.                                                                                                                                                      |
| Second-line chemotherapy after disease progression following first-line FOLFOXIRI in advanced pancreatic cancer patients                                                                                  | Vasile E, Vivaldi C, Fornaro L, Caparello C, Musettini G, Pasquini G, et al.<br>Ann Oncol 2015;26(suppl 6):vi90-vi105(abstr L26).       | No adequate separate data on second-line treatment. | Regimens other than the ones based on Gemcitabine have been used. Also, there are no separate data for each chemotherapy regimen in the second-line setting.                                               |
| Second-line treatment after disease progression following first-line chemotherapy with modified FOLFIRINOX in advanced pancreatic cancer patients: A single institution retrospective cohort study        | Vivaldi C, Caparello C, Pasquini G, Musettini G, Catanese S, Lencioni M, A, et al.<br>Ann Oncol 2015;26(suppl 4);iv1-iv100(abstr P180). | No adequate separate data on second-line treatment. | Patients were treated with a multitude of regimens in the second-line setting. There was no specific description of the outcomes of patients treated with Gemcitabine-based chemotherapy after FOLFIRINOX. |
| Second-line treatment after disease progression following first-line chemotherapy with modified FOLFIRINOX in advanced pancreatic cancer patients                                                         | Vivaldi C, Vasile E, Fornaro L, Caparello C, Musettini G, Pasquini G, et al.<br>Eur J Cancer 2015;51(suppl 3):S456-457(abstr 2362).     | No adequate separate data on second-line treatment. | Patients were treated with a multitude of regimens in the second-line setting. There was no specific description of the outcomes of patients treated with Gemcitabine-based chemotherapy after FOLFIRINOX. |
| Gemcitabine plus nab-paclitaxel in metastatic or locally inoperable pancreatic cancer-a single center experience                                                                                          | Vogl U, Vormittag L, Winkler T, Kafka A, Henry M, Schima W, et al.<br>Ann Oncol 2015;26(suppl 4):iv1-iv100 (abstr P179).                | Inability to access full poster.                    | We tried to get in touch with one of the authors (UMV) through e-mail on July 15 <sup>th</sup> 2018 with no success.                                                                                       |
| Efficacy and tolerability of second-line nab-paclitaxel and gemcitabine (NG) after failing first-line FOLFIRINOX in patients (pts) with advanced pancreatic cancer (APC): A single-institution experience | Zhang H, Kellelt C, Lambert PJ, Kim C.<br>J Clin Oncol 2017;35(15):(abstr e15723).                                                      | Repeated study.                                     | Full-text article already selected.                                                                                                                                                                        |
| Second-line gemcitabine plus nab-paclitaxel (G+A) for advanced pancreatic cancer (APC) after first-line FOLFIRINOX: Single institution                                                                    | Zhang Y, Hochster HS, Stein S, Lacy J.<br>J Clin Oncol 2014;32(3):(abstr 344).                                                          | Repeated study.                                     | Full-text article already selected.                                                                                                                                                                        |

|                                                  |  |  |  |
|--------------------------------------------------|--|--|--|
| retrospective review<br>of efficacy and toxicity |  |  |  |
|--------------------------------------------------|--|--|--|

Supplementary Table S5. Bibliographic characteristics of the selected studies.

| Study           | Type of study             | Multicentric study | Country of origin | Year of publication | Type of publication | Funding source             |
|-----------------|---------------------------|--------------------|-------------------|---------------------|---------------------|----------------------------|
| Aung et al      | Retrospective             | No                 | Canada            | 2017                | Meeting abstract    | Not stated                 |
| Chan et al      | Retrospective             | No                 | USA               | 2016                | Meeting abstract    | Not stated                 |
| El Rassy et al  | Retrospective             | No                 | Lebanon           | 2017                | Full-text article   | Not stated                 |
| Fernandes et al | Retrospective             | No                 | Brazil            | 2017                | Meeting abstract    | Not stated                 |
| Gilabert et al  | Retrospective             | Yes                | France and Canada | 2017                | Full-text article   | Not stated                 |
| Lino et al      | Retrospective             | No                 | Brazil            | 2015                | Full-text article   | Not stated                 |
| Nguyen et al    | Retrospective             | No                 | USA               | 2017                | Full-text article   | UCI biostatistics facility |
| Okano et al     | Retrospective             | No                 | Japan             | 2016                | Meeting abstract    | Not stated                 |
| Ozaka et al     | Retrospective             | No                 | Japan             | 2018                | Meeting abstract    | Not stated                 |
| Portal et al    | Prospective observational | Yes                | France            | 2015                | Full-text article   | Not stated                 |
| Salem et al     | Retrospective             | Yes                | USA               | 2014                | Meeting abstract    | Not stated                 |
| Sarabi et al    | Retrospective             | No                 | France            | 2017                | Full-text article   | Not stated                 |
| Vendrell et al  | Retrospective             | Yes                | Portugal          | 2017                | Meeting abstract    | Not stated                 |
| Viaud et al     | Retrospective             | Yes                | France            | 2017                | Full-text article   | Not stated                 |
| Zhang H et al   | Retrospective             | Yes                | Canada            | 2018                | Full-text article   | Not stated                 |
| Zhang Y et al   | Retrospective             | No                 | USA               | 2015                | Full-text article   | None                       |

Supplementary Table S6. Characteristics of the populations from the selected studies.



| Study                          | Sample size | Male (%)  | Age – median (range) | ECOG 0/1 (%) | Stage IV at start of Gemcitabine (%) | Progression on FOLFIRINOX (%) | Objective response to FOLFIRINOX (%) |
|--------------------------------|-------------|-----------|----------------------|--------------|--------------------------------------|-------------------------------|--------------------------------------|
| <b>Gemcitabine monotherapy</b> |             |           |                      |              |                                      |                               |                                      |
| Aung et al (1)                 | 50          | 27 (54.0) | 62 (28-74)           | -            | 37 (74.0)                            | -                             | -                                    |
| Chan et al (1)                 | 36          | 22 (61.1) | 58.5 (41-77)         | 30 (83.3)    | 36 (100.0)                           | -                             | -                                    |
| Fernandes et al                | 28          | 19 (67.9) | 55 (38-75)           | -            | -                                    | 28 (100.0)                    | 39.0                                 |
| Gilabert et al                 | 72          | 45 (62.5) | 63.5 (32-75)         | -            | 64 (88.9)                            | 61 (84.7)                     | 40.0                                 |
| Lino et al                     | 20          | 16 (80.0) | 57 (43-74)           | 13 (65.0)    | 20 (100.0)                           | 20 (100.0)                    | -                                    |
| Sarabi et al                   | 42          | 22 (52.4) | 63.5 (47-76)         | 38 (90.5)    | 41 (97.6)                            | 35 (83.3)                     | -                                    |
| Viaud et al                    | 96          | 49 (51.0) | 62 (38-80)           | 45 (46.9)    | 87 (90.6)                            | 81 (84.4)                     | 40.0                                 |
| Zhang H et al (1)              | 8           | 6 (75.0)  | 68                   | 6 (75.0)     | 6 (75.0)                             | -                             | -                                    |

| Study                                  | Sample size | Male (%)  | Age – median (range) | ECOG 0/1 (%) | Stage IV at start of Gemcitabine (%) | Progression on FOLFIRINOX (%) | Objective response to FOLFIRINOX (%) |
|----------------------------------------|-------------|-----------|----------------------|--------------|--------------------------------------|-------------------------------|--------------------------------------|
| <b>Gemcitabine plus Nab-Paclitaxel</b> |             |           |                      |              |                                      |                               |                                      |
| Aung et al (2)                         | 17          | 11 (64.7) | 58 (35-74)           | -            | 12 (70.6)                            | -                             | -                                    |
| Chan et al (2)                         | 33          | 24 (72.7) | 60 (44-77)           | 31 (93.9)    | 33 (100.0)                           | -                             | -                                    |
| El Rassy et al                         | 12          | 10 (83.3) | 61 (52-74)           | -            | 12 (100.0)                           | 12 (100.0)                    | -                                    |
| Nguyen et al                           | 30          | 16 (53.3) | 63 (46-78)           | -            | 26 (86.7)                            | 22 (73.3)                     | 3.3                                  |
| Okano et al                            | 10          | -         | -                    | -            | -                                    | -                             | -                                    |
| Ozaka et al                            | 25          | 16 (64.0) | 66 (40-73)           | 25 (100.0)   | 25 (100.0)                           | -                             | -                                    |
| Portal et al                           | 57          | 27 (47.4) | 59.9 (35-92)         | 45 (78.9)    | 57 (100.0)                           | 54 (94.7)                     | 39.0                                 |
| Salem et al                            | 12          | -         | -                    | -            | -                                    | -                             | -                                    |
| Vendrell, et al                        | 30          | -         | 64 (45-78)           | -            | 27 (90.0)                            | -                             | -                                    |
| Zhang H et al (2)                      | 30          | 15 (50.0) | 62                   | 26 (86.7)    | 22 (73.3)                            | -                             | -                                    |
| Zhang Y et al                          | 28          | 11 (39.3) | 61 (50-74)           | 27 (96.4)    | 23 (82.1)                            | 27 (96.4)                     | 28.6                                 |

Supplementary Table S7. Treatment characteristics.

| Study                                  | N  | Treatment schedule                                                                                        | Number of treatment cycles (median) | Number of treatment cycles (range) |
|----------------------------------------|----|-----------------------------------------------------------------------------------------------------------|-------------------------------------|------------------------------------|
| <b>Gemcitabine monotherapy</b>         |    |                                                                                                           |                                     |                                    |
| Aung et al (1)                         | 50 | Not described                                                                                             | 2                                   | 1 - 7                              |
| Chan et al (1)                         | 36 | Gemcitabine 1000 mg/m <sup>2</sup> D1,8,15 <sup>#</sup>                                                   | 2                                   | -                                  |
| Fernandes et al                        | 28 | Not described                                                                                             | 3                                   | 1 - 8                              |
| Gilbert et al                          | 72 | Gemcitabine 1000 mg/m <sup>2</sup> D1,8,15                                                                | 3                                   | 1 - 8                              |
| Lino et al                             | 20 | Gemcitabine 1000 mg/m <sup>2</sup> D1,8,15                                                                | 2                                   | 1 - 8                              |
| Sarabi et al                           | 42 | Not described                                                                                             | 1.5                                 | 1 - 13                             |
| Viaud et al                            | 96 | Gemcitabine 1000 mg/m <sup>2</sup> D1,8,15                                                                | 2                                   | 1 - 14                             |
| Zhang H et al (1)                      | 8  | Not described                                                                                             | 2                                   | -                                  |
| <b>Gemcitabine plus Nab-Paclitaxel</b> |    |                                                                                                           |                                     |                                    |
| Aung et al (2)                         | 17 | Not described                                                                                             | 2                                   | 1 - 9                              |
| Chan et al (2)                         | 33 | Gemcitabine 1000 mg/m <sup>2</sup> D1,8,15 plus Nab-Paclitaxel 125 mg/m <sup>2</sup> D1,8,15 <sup>#</sup> | 5.5                                 | -                                  |
| El Rassy et al                         | 12 | Gemcitabine 1000 mg/m <sup>2</sup> D1,8,15 plus Nab-Paclitaxel 125 mg/m <sup>2</sup> D1,8,15              | 3                                   | 1 - 16                             |
| Nguyen et al                           | 30 | Not described                                                                                             | 4                                   | 1 - 21                             |
| Okano et al                            | 10 | Not described                                                                                             | -                                   | -                                  |
| Ozaka et al                            | 25 | Not described                                                                                             | -                                   | -                                  |
| Portal et al                           | 57 | Gemcitabine 1000 mg/m <sup>2</sup> D1,8,15 plus Nab-Paclitaxel 125 mg/m <sup>2</sup> D1,8,15              | 4                                   | 1 - 12                             |
| Salem et al                            | 12 | Not described                                                                                             | 2                                   | 1 - 10                             |
| Vendrell, et al                        | 30 | Not described                                                                                             | 6                                   | 1 - 13                             |
| Zhang H et al (2)                      | 30 | Not described                                                                                             | 3                                   | -                                  |
| Zhang Y et al                          | 28 | Gemcitabine 1000 mg/m <sup>2</sup> D1,8,15 plus Nab-Paclitaxel 100 mg/m <sup>2</sup> D1,8,15              | 2                                   | 1 - 9                              |

<sup>#</sup> Based on dose-intensity calculation.

Supplementary Table S8. Risk of bias assessment.

| Domain                         | Selection                                                                       | Ascertainment                             |                                             | Causality                                         | Reporting                                                                            |          | Overall Quality |
|--------------------------------|---------------------------------------------------------------------------------|-------------------------------------------|---------------------------------------------|---------------------------------------------------|--------------------------------------------------------------------------------------|----------|-----------------|
| Question                       | Does the patients represent the whole experience of the investigator (center)?# | Was the exposure adequately ascertained?§ | Were the outcomes adequately ascertained?§& | Was follow-up long enough for outcomes to occur?‡ | Enough details to enable practitioners to make inferences about their own practice?¹ | Sum      |                 |
|                                |                                                                                 |                                           |                                             |                                                   | Efficacy                                                                             | Toxicity |                 |
| <b>Non-comparative studies</b> |                                                                                 |                                           |                                             |                                                   |                                                                                      |          |                 |
| El Rassy, 2017                 | X                                                                               | X                                         | O                                           | O                                                 | X                                                                                    | X        | 4               |
| Fernandes, 2017                | X                                                                               | X                                         | O                                           | O                                                 | X                                                                                    | O        | 3               |
| Gilbert, 2017                  | X                                                                               | X                                         | X                                           | X                                                 | X                                                                                    | O        | 5               |
| Lino, 2015                     | X                                                                               | X                                         | X                                           | O                                                 | X                                                                                    | O        | 4               |
| Nguyen, 2017                   | X                                                                               | X                                         | X                                           | O                                                 | X                                                                                    | X        | 5               |
| Okano, 2016                    | O                                                                               | X                                         | O                                           | O                                                 | X                                                                                    | X        | 3               |
| Ozaka, 2018                    | X                                                                               | X                                         | O                                           | O                                                 | X                                                                                    | X        | 4               |
| Portal, 2015                   | X                                                                               | X                                         | X                                           | X                                                 | X                                                                                    | X        | 6               |
| Salem, 2014                    | X                                                                               | X                                         | O                                           | O                                                 | X                                                                                    | O        | 3               |
| Sarabi, 2017                   | X                                                                               | X                                         | X                                           | X                                                 | X                                                                                    | X        | 6               |
| Vendrell, 2017                 | X                                                                               | X                                         | O                                           | O                                                 | X                                                                                    | X        | 4               |
| Viaud, 2017                    | X                                                                               | X                                         | X                                           | X                                                 | X                                                                                    | X        | 6               |
| Zhang Y, 2015                  | X                                                                               | X                                         | X                                           | O                                                 | X                                                                                    | X        | 5               |

| Domain                     | Selection                                                                                   | Ascertainment                                         |                                                            | Causality                                                     | Reporting |          | Overall Quality |
|----------------------------|---------------------------------------------------------------------------------------------|-------------------------------------------------------|------------------------------------------------------------|---------------------------------------------------------------|-----------|----------|-----------------|
| Question                   | Does the patients represent the whole experience of the investigator (center)? <sup>#</sup> | Was the exposure adequately ascertained? <sup>§</sup> | Were the outcomes adequately ascertained? <sup>&amp;</sup> | Was follow-up long enough for outcomes to occur? <sup>‡</sup> | Efficacy  | Toxicity | Sum             |
| <b>Comparative studies</b> |                                                                                             |                                                       |                                                            |                                                               |           |          |                 |
| Aung, 2017                 | X                                                                                           | X                                                     | X                                                          | X                                                             | X         | O        | 5               |
| Chan, 2016                 | X                                                                                           | X                                                     | X                                                          | O                                                             | X         | O        | 4               |
| Zhang H, 2018              | X                                                                                           | X                                                     | X                                                          | X                                                             | X         | X        | 6               |

X = YES, O = No/Unknown  
<sup>#</sup> Some studies did not clearly state that all consecutive patients were enrolled, but they clearly defined inclusion criteria.  
<sup>§</sup> Some studies did not fully describe dosing and schedule, but since there is a standard regimen for both Gemcitabine monotherapy and Gemcitabine plus Nab-paclitaxel, the description of the drug used was considered acceptable.  
<sup>&</sup> Proper definition of time-to-event outcomes (overall survival and progression-free survival) included date of treatment start, date of the event, and definition of the event. Response evaluation also had to be performed by RECIST (versions 1.0 or 1.1).  
<sup>‡</sup> Adequate follow-up was arbitrarily defined as ≤ 20% censoring rate for progression-free survival; for the response rate and disease-free survival outcomes, > 80% of patients had to be assessable for response.  
<sup>¶</sup> Feasibility of the studied regimen included adequate description of the toxicity profile (at least grade 3 to 4 toxicities).

Supplementary Table S9. Evaluation of response to treatment.

| Study                                  | N  | Method of response evaluation | Radiological review | Objective response rate (%) | Disease control rate (%)  |
|----------------------------------------|----|-------------------------------|---------------------|-----------------------------|---------------------------|
| <b>Gemcitabine monotherapy</b>         |    |                               |                     |                             |                           |
| Aung et al (1)                         | 50 | Unknown                       | No/Unknown          | -                           | -                         |
| Chan et al (1)                         | 36 | Unknown                       | No/Unknown          | -                           | -                         |
| Fernandes et al                        | 28 | RECIST 1.1                    | No/Unknown          | 1 (3.5)                     | 5 (17.8)                  |
| Gilbert et al                          | 72 | RECIST 1.1                    | No/Unknown          | 8 (11.1)                    | 25 (34.7)                 |
| Lino et al                             | 20 | RECIST                        | No/Unknown          | -                           | -                         |
| Sarabi et al                           | 42 | RECIST 1.0                    | No/Unknown          | -                           | 11 (26.1)                 |
| Viaud et al                            | 96 | RECIST 1.1                    | No/Unknown          | 8 (8.3)                     | 32 (33.3)                 |
| Zhang H et al (1)                      | 8  | RECIST 1.0 <sup>§</sup>       | No/Unknown          | -                           | -                         |
| <b>Gemcitabine plus Nab-Paclitaxel</b> |    |                               |                     |                             |                           |
| Aung et al (2)                         | 17 | Unknown                       | No/Unknown          | -                           | -                         |
| Chan et al (2)                         | 33 | Unknown                       | No/Unknown          | -                           | -                         |
| El Rassy et al                         | 12 | Unknown                       | No/Unknown          | 3 (25.0)                    | 6 (50.0) <sup>&amp;</sup> |
| Nguyen et al                           | 30 | RECIST 1.1                    | Yes                 | 5 (30.0)                    | 17 (56.7)                 |
| Okano et al                            | 10 | Unknown                       | No/Unknown          | 0 (0.0)                     | 5 (50.0)                  |
| Ozaka et al                            | 25 | Unknown                       | No/Unknown          | 3 (12.0)                    | 16 (64.0)                 |
| Portal et al                           | 57 | RECIST 1.1                    | No/Unknown          | 10 (17.5)                   | 33 (57.8)                 |
| Salem et al                            | 12 | RECIST                        | No/Unknown          | 1 (8.3)                     | 3 (25.0)                  |
| Vendrell, et al                        | 30 | Unknown                       | No/Unknown          | -                           | -                         |
| Zhang H et al (2)                      | 30 | RECIST 1.0 <sup>§</sup>       | No/Unknown          | -                           | -                         |
| Zhang Y et al                          | 28 | RECIST 1.1 <sup>#</sup>       | Yes                 | 5 (17.8)                    | 13 (34.2)                 |

<sup>§</sup> RECIST used only to evaluate response to first-line FOLFIRINOX.

<sup>#</sup> Review by the investigators with independent onsite radiologists.

<sup>&</sup> Conservative estimate (only 10 patients assessed for response).

Supplementary Table S10. Toxicity data (part 1).



| Study                      | Treatment-related mortality (%) | Any G3/4 toxicity (%) | Nausea G3/4 (%) | Vomiting G3/4 (%) | Diarrhea G3/4 (%) | Mucositis G3/4 (%) | Neuropathy G3/4 (%) | Fatigue G3/4 (%) |
|----------------------------|---------------------------------|-----------------------|-----------------|-------------------|-------------------|--------------------|---------------------|------------------|
| Gemcitabine monotherapy    |                                 |                       |                 |                   |                   |                    |                     |                  |
| Aung et al (1)             | -                               | -                     | -               | -                 | -                 | -                  | -                   | -                |
| Chan et al (1)             | -                               | -                     | -               | -                 | -                 | -                  | -                   | -                |
| Fernandes et al            | 0 (0.0)                         | 5 (17.8)              | -               | -                 | -                 | -                  | -                   | -                |
| Gilbert et al <sup>§</sup> | 0 (0.0)                         | -                     | -               | -                 | -                 | -                  | -                   | -                |
| Lino et al                 | -                               | -                     | -               | -                 | -                 | -                  | -                   | -                |
| Sarabi et al <sup>§</sup>  | 0 (0.0)                         | 6 (14.3)              | 0 (0.0)         | 0 (0.0)           | 0 (0.0)           | 0 (0.0)            | 0 (0.0)             | 1 (2.4)          |
| Viaud et al <sup>§</sup>   | 0 (0.0)                         | 34 (35.4)             | 2 (2.0)         | 2 (2.0)           | 0 (0.0)           | 0 (0.0)            | 0 (0.0)             | 19 (19.8)        |
| Zhang H et al (1)          | -                               | -                     | 0 (0.0)         | 0 (0.0)           | 0 (0.0)           | -                  | 0 (0.0)             | 3 (37.5)         |

| Study                           | Treatment-related mortality (%) | Any G3/4 toxicity (%) | Nausea G3/4 (%) | Vomiting G3/4 (%) | Diarrhea G3/4 (%) | Mucositis G3/4 (%) | Neuropathy G3/4 (%) | Fatigue G3/4 (%) |
|---------------------------------|---------------------------------|-----------------------|-----------------|-------------------|-------------------|--------------------|---------------------|------------------|
| Gemcitabine plus Nab-Paclitaxel |                                 |                       |                 |                   |                   |                    |                     |                  |
| Aung et al (2)                  | -                               | -                     | -               | -                 | -                 | -                  | -                   | -                |
| Chan et al (2)                  | -                               | -                     | -               | -                 | -                 | -                  | -                   | -                |
| El Rassy et al                  | 0 (0.0)                         | 0 (0.0)               | 0 (0.0)         | 0 (0.0)           | 0 (0.0)           | 0 (0.0)            | 0 (0.0)             | 0 (0.0)          |
| Nguyen et al <sup>§</sup>       | -                               | -                     | 5 (16.7)        | -                 | 1 (3.3)           | -                  | 1 (3.3)             | 1 (3.3)          |
| Okano et al                     | -                               | 8 (80.0)              | 1 (10.0)        | 1 (10.0)          | 0 (0.0)           | 0 (0.0)            | 2 (20.0)            | -                |
| Ozaka et al                     | 0 (0.0)                         | -                     | 0 (0.0)         | -                 | 0 (0.0)           | 0 (0.0)            | 1 (4.0)             | 0 (0.0)          |
| Portal et al <sup>§</sup>       | 0 (0.0)                         | 21 (36.8)             | 2 (3.5)         | 2 (3.5)           | 1 (1.8)           | 1 (1.8)            | 7 (12.3)            | 5 (8.8)          |
| Salem et al                     | -                               | -                     | -               | -                 | -                 | -                  | -                   | -                |
| Vendrell, et al                 | 0 (0.0)                         | 12 (40.0)             | 0 (0.0)         | 0 (0.0)           | 1 (3.3)           | 0 (0.0)            | 1 (3.3)             | 1 (3.3)          |
| Zhang H et al (2)               | -                               | -                     | 0 (0.0)         | 0 (0.0)           | 2 (6.7)           | -                  | 0 (0.0)             | 1 (3.3)          |
| Zhang Y et al                   | 0 (0.0)                         | -                     | -               | -                 | -                 | -                  | -                   | -                |

<sup>§</sup> Based on CTCAE 4.0.  
& Based on CTCAE 3.0.

Supplementary Table S11. Progression-free survival after start of Gemcitabine-based chemotherapy (PFS).

| Study                                  | N  | Median progression-free survival (months) | Progression-free survival 95%CI (months) | 3-month progression-free survival rate (%) | 6-month progression-free survival rate (%) |
|----------------------------------------|----|-------------------------------------------|------------------------------------------|--------------------------------------------|--------------------------------------------|
| <b>Gemcitabine monotherapy</b>         |    |                                           |                                          |                                            |                                            |
| Aung et al (1)                         | 50 | -                                         | -                                        | -                                          | -                                          |
| Chan et al (1)                         | 36 | 1.9                                       | -                                        | 28.0 <sup>§</sup>                          | 19.3 <sup>§</sup>                          |
| Fernandes et al                        | 28 | 2.0                                       | 0.2 – 7.7                                | -                                          | -                                          |
| Gilbert et al                          | 72 | 2.5                                       | 0.2 – 10.8                               | -                                          | -                                          |
| Lino et al                             | 20 | 2.0                                       | 1.2 – 2.8                                | 35.1 <sup>§</sup>                          | 20.1 <sup>§</sup>                          |
| Sarabi et al                           | 42 | -                                         | -                                        | -                                          | -                                          |
| Viaud et al                            | 96 | 2.1                                       | 2.0 – 2.6                                | 30.4 <sup>§</sup>                          | 16.0                                       |
| Zhang H et al (1)                      | 8  | 2.5                                       | -                                        | 37.5 <sup>§</sup>                          | 0.0                                        |
| <b>Gemcitabine plus Nab-Paclitaxel</b> |    |                                           |                                          |                                            |                                            |
| Aung et al (2)                         | 17 | -                                         | -                                        | -                                          | -                                          |
| Chan et al (2)                         | 33 | 2.4                                       | -                                        | 42.4 <sup>§</sup>                          | 23.6 <sup>§</sup>                          |
| El Rassy et al                         | 12 | 4.9                                       | -                                        | -                                          | -                                          |
| Nguyen et al                           | 30 | 3.7                                       | 2.7 – 6.1                                | 60.2 <sup>§</sup>                          | 29.2 <sup>§</sup>                          |
| Okano et al                            | 10 | 5.1                                       | 0.0 – 12.5                               | 56.6 <sup>§</sup>                          | 22.8 <sup>§</sup>                          |
| Ozaka et al                            | 25 | 6.0                                       | -                                        | 84.5 <sup>§</sup>                          | 50.0                                       |
| Portal et al                           | 57 | 5.1                                       | 3.2 – 6.2                                | 64.0 <sup>§</sup>                          | 39.0                                       |
| Salem et al                            | 12 | 3.3                                       | 1.8 - NR                                 | -                                          | 8.0 <sup>‡</sup>                           |
| Vendrell, et al                        | 30 | 6.4                                       | 3.0 – 8.5                                | 82.9 <sup>#</sup>                          | 57.4 <sup>#</sup>                          |
| Zhang H et al (2)                      | 30 | 3.6                                       | -                                        | 66.7 <sup>§</sup>                          | 20.0 <sup>§</sup>                          |
| Zhang Y et al                          | 28 | 2.8 <sup>‡</sup>                          | 0.4 – 8.4 <sup>‡,&amp;</sup>             | -                                          | -                                          |

<sup>§</sup> Based on digital extraction method.

<sup>‡</sup> Time to treatment failure.

<sup>&</sup> Range.

<sup>#</sup> Data obtained directly from author.

NR = not reached.

Supplementary Table S12. Overall Survival after start of Gemcitabine-based chemotherapy (OS-GEM).

| Study                                  | N  | Median overall survival (months) | Overall survival 95%CI (months) | 6-month overall survival rate (%) | 12-month overall survival rate (%) |
|----------------------------------------|----|----------------------------------|---------------------------------|-----------------------------------|------------------------------------|
| <b>Gemcitabine monotherapy</b>         |    |                                  |                                 |                                   |                                    |
| Aung et al (1)                         | 50 | 3.1                              | 0.2 – 10.6                      | 16.0                              | 0.0                                |
| Chan et al (1)                         | 36 | 4.8                              | -                               | 47.0 <sup>§</sup>                 | 15.7 <sup>§</sup>                  |
| Fernandes et al                        | 28 | 5.6                              | 0.4 – 11.5                      | -                                 | -                                  |
| Gilabert et al                         | 72 | -                                | -                               | -                                 | -                                  |
| Lino et al                             | 20 | 5.7                              | 3.9 – 7.4                       | 44.1 <sup>§</sup>                 | 22.0 <sup>§</sup>                  |
| Sarabi et al                           | 42 | 3.6                              | 2.1 – 5.1                       | 37.7                              | 11.5                               |
| Viaud et al                            | 96 | 3.7                              | 2.5 – 5.2                       | 35.0                              | 10.0                               |
| Zhang H et al (1)                      | 8  | 3.8                              | -                               | 0.0                               | 0.0                                |
| <b>Gemcitabine plus Nab-Paclitaxel</b> |    |                                  |                                 |                                   |                                    |
| Aung et al (2)                         | 17 | 4.6                              | 1.2 – 11.6                      | 35.0                              | 0.0                                |
| Chan et al (2)                         | 33 | 6.1                              | -                               | 53.1 <sup>§</sup>                 | 22.8 <sup>§</sup>                  |
| El Rassy et al                         | 12 | NR                               | -                               | 83.3                              | -                                  |
| Nguyen et al                           | 30 | 12.4                             | 6.8 – 15.0                      | 66.3 <sup>§</sup>                 | 50.3 <sup>§</sup>                  |
| Okano et al                            | 10 | 7.8                              | 2.8 – 12.7                      | 66.8 <sup>§</sup>                 | 16.5 <sup>§</sup>                  |
| Ozaka et al                            | 25 | 10.2                             | -                               | 82.5 <sup>§</sup>                 | 38.2 <sup>§</sup>                  |
| Portal et al                           | 57 | 8.8                              | 6.2 – 9.7                       | 69.0                              | 15.0                               |
| Salem et al                            | 12 | -                                | -                               | -                                 | -                                  |
| Vendrell, et al                        | 30 | 11.4                             | 8.4 – 16.5                      | 93.0 <sup>#</sup>                 | 44.1 <sup>#</sup>                  |
| Zhang H et al (2)                      | 30 | 5.7                              | -                               | 49.0 <sup>§</sup>                 | 19.7 <sup>§</sup>                  |
| Zhang Y et al                          | 28 | 5.4                              | 0.5 – 19.9 <sup>&amp;</sup>     | -                                 | -                                  |

<sup>§</sup> Based on digital extraction method.

<sup>&</sup> Range.

<sup>#</sup> Data obtained directly from author.

NR = not reached.

Supplementary Sable S13. Overall Survival after start of FOLFIRINOX (OS-FFX).

| Study                                  | N  | Median overall survival (months) | Overall survival 95%CI (months) | 12-month overall survival rate (%) | 18-month overall survival rate (%) |
|----------------------------------------|----|----------------------------------|---------------------------------|------------------------------------|------------------------------------|
| <b>Gemcitabine monotherapy</b>         |    |                                  |                                 |                                    |                                    |
| Aung et al (1)                         | 50 | -                                | -                               | -                                  | -                                  |
| Chan et al (1)                         | 36 | -                                | -                               | -                                  | -                                  |
| Fernandes et al                        | 28 | -                                | -                               | -                                  | -                                  |
| Gilabert et al                         | 72 | 13.6                             | 2.0 – 35.0                      | 58.4 <sup>§</sup>                  | 29.4 <sup>§</sup>                  |
| Lino et al                             | 20 | -                                | -                               | -                                  | -                                  |
| Sarabi et al                           | 42 | 13.4                             | 3.3 – 30.7 <sup>&amp;</sup>     | -                                  | -                                  |
| Viaud et al                            | 96 | 11.2                             | 10.4 – 14.0                     | 46.0                               | -                                  |
| Zhang H et al (1)                      | 8  | -                                | -                               | -                                  | -                                  |
| <b>Gemcitabine plus Nab-Paclitaxel</b> |    |                                  |                                 |                                    |                                    |
| Aung et al (2)                         | 17 | -                                | -                               | -                                  | -                                  |
| Chan et al (2)                         | 33 | -                                | -                               | -                                  | -                                  |
| El Rassy et al                         | 12 | -                                | -                               | -                                  | -                                  |
| Nguyen et al                           | 30 | 13.7                             | 11.0 – 17.7                     | 60.9 <sup>§</sup>                  | 20.2 <sup>§</sup>                  |
| Okano et al                            | 10 | -                                | -                               | -                                  | -                                  |
| Ozaka et al                            | 25 | 17.4                             | -                               | 82.6 <sup>§</sup>                  | 46.3 <sup>§</sup>                  |
| Portal et al                           | 57 | 18.0                             | 16 – 21.2                       | 82.0                               | 50.0                               |
| Salem et al                            | 12 | 16.2                             | 14.3 – NR                       | -                                  | -                                  |
| Vendrell, et al                        | 30 | 22.1 <sup>#</sup>                | 16.9 – 29.3 <sup>#</sup>        | 85.4 <sup>#</sup>                  | 60.5 <sup>#</sup>                  |
| Zhang H et al (2)                      | 30 | -                                | -                               | -                                  | -                                  |
| Zhang Y et al                          | 28 | -                                | -                               | -                                  | -                                  |

<sup>§</sup> Based on digital extraction method.

<sup>&</sup> Range.

<sup>#</sup> Data obtained directly from author.

NR = not reached.

Supplementary Table S14. Biochemical response rate (BRR) to Gemcitabine-based chemotherapy.

| Study                                  | N  | Response criteria            | Biochemical response rate (%) |
|----------------------------------------|----|------------------------------|-------------------------------|
| <b>Gemcitabine plus Nab-Paclitaxel</b> |    |                              |                               |
| Nguyen et al                           | 30 | ≥ 50% drop in CA 19-9 levels | 19 (63.3)                     |
| Zhang Y et al                          | 28 | ≥ 30% drop in CA 19-9 levels | 13 (46.4)                     |

Supplementary Table S15. Toxicity data (part 2).

| Study                          | Anemia G3/4 (%) | Neutropenia G3/4 (%) | Febrile neutropenia (%) | Thrombocytopenia G3/4 (%) |
|--------------------------------|-----------------|----------------------|-------------------------|---------------------------|
| <b>Gemcitabine monotherapy</b> |                 |                      |                         |                           |
| Aung et al (1)                 | -               | -                    | -                       | -                         |
| Chan et al (1)                 | -               | -                    | -                       | -                         |
| Fernandes et al                | -               | -                    | -                       | -                         |
| Gilbert et al <sup>&amp;</sup> | -               | -                    | -                       | -                         |
| Lino et al                     | -               | -                    | -                       | -                         |
| Sarabi et al <sup>§</sup>      | 0 (0.0)         | 4 (9.5)              | 0 (0.0)                 | 1 (2.4)                   |
| Viaud et al <sup>§</sup>       | 3 (3.1)         | 12 (12.5)            | -                       | 6 (6.3)                   |
| Zhang H et al (1)              | 0 (0.0)         | 1 (12.5)             | -                       | 1 (12.5)                  |



| Study                                  | Anemia G3/4 (%) | Neutropenia G3/4 (%) | Febrile neutropenia (%) | Thrombocytopenia G3/4 (%) |
|----------------------------------------|-----------------|----------------------|-------------------------|---------------------------|
| <b>Gemcitabine plus Nab-Paclitaxel</b> |                 |                      |                         |                           |
| Aung et al (2)                         | -               | -                    | -                       | -                         |
| Chan et al (2)                         | -               | -                    | -                       | -                         |
| El Rassy et al                         | 0 (0.0)         | 0 (0.0)              | 0 (0.0)                 | 0 (0.0)                   |
| Nguyen et al <sup>§</sup>              | 7 (23.3)        | 0 (0.0)              | 0 (0.0)                 | 10 (33.3)                 |
| Okano et al                            | 0 (0.0)         | 5 (50.0)             | 0 (0.0)                 | 5 (50.0)                  |
| Ozaka et al                            | 3 (12.0)        | 10 (40.0)            | 1 (4.0)                 | 1 (4.0)                   |
| Portal et al <sup>§</sup>              | 2 (3.5)         | 7 (12.3)             | -                       | 4 (7.0)                   |
| Salem et al                            | -               | -                    | -                       | -                         |
| Vendrell, et al                        | 1 (3.3)         | 3 (10.0)             | 0 (0.0)                 | 5 (16.7)                  |
| Zhang H et al (2)                      | 1 (3.3)         | 7 (23.3)             | -                       | 4 (13.3)                  |
| Zhang Y et al                          | 7 (25.0)        | 5 (17.9)             | 0 (0.0)                 | 7 (25.0)                  |

<sup>§</sup> Based on CTCAE 4.0.

\* Based on CTCAE 3.0.

## Supplementary figures

Supplementary Figure S1. Overall survival from the start of Gemcitabine-based chemotherapy (OS-GEM) across different studies using Gemcitabine-based chemotherapy (median, 6-month OS-GEM rate, and 12-month OS-GEM rate).

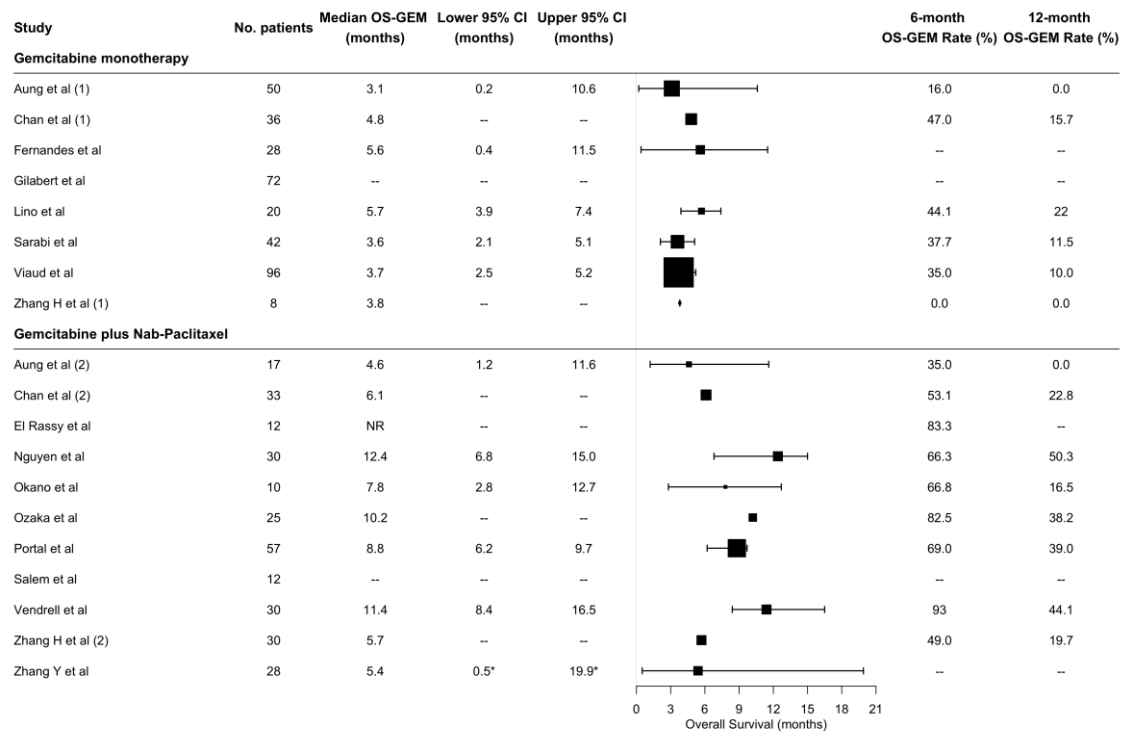

Supplementary Figure S1 legend. (\*) Interval refers to range and not 95% confidence interval.

Supplementary Figure S2. Overall survival from the start of FOLFIRINOX (OS-FFX) across different studies using Gemcitabine-based chemotherapy (median, 12-month OS-FFX rate, and 18-month OS-FFX rate).

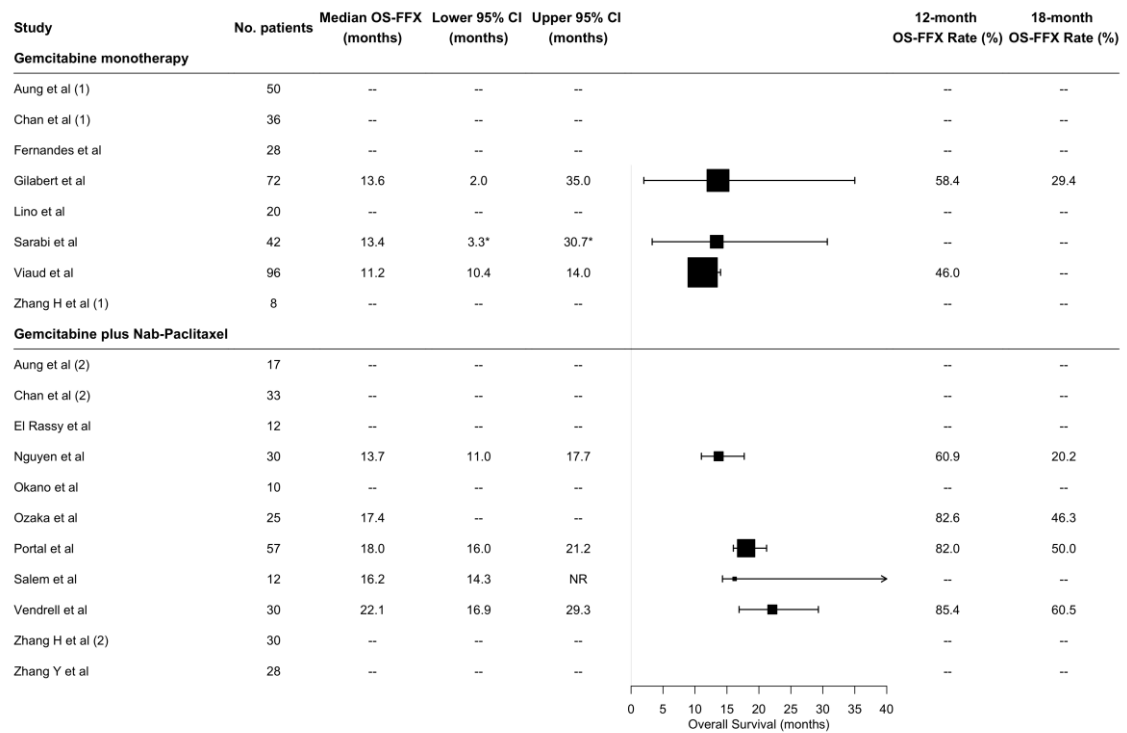

Supplementary Figure S2 legend. (\*) Interval refers to range and not 95% confidence interval.

Supplementary Figure S3. Funnel plot of In Odds (Response) vs. study sample size.

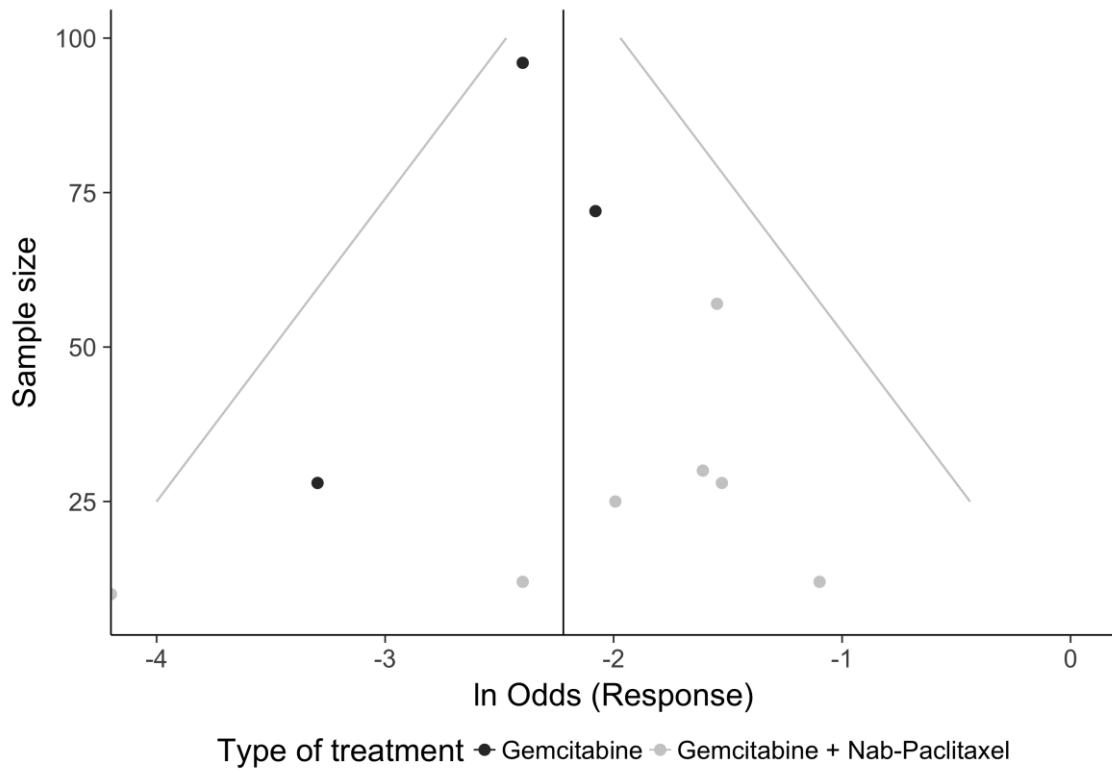

Supplement: Supplementary_Material_TO_SEND_TAMO.pdf [file Supplementary_Material_TO_SEND_TAMO.pdf]
